# Supplementary material for: Enhancing Spiritual Well-Being, Physical Activity, and Happiness in Hospitalized Older Adult Patients with Swallowing Difficulties: A Comparative Study of Thickeners and Swallowing Exercises
Source: MDPI journal article supplement (doi:10.3390/healthcare11182595), 2023-09-21
Supplement: s1 [file s1]

## Supplementary Figure S1

Eating assessment, physical activity, spiritual well-being, and happiness before and after the interventions.

**Figure A**

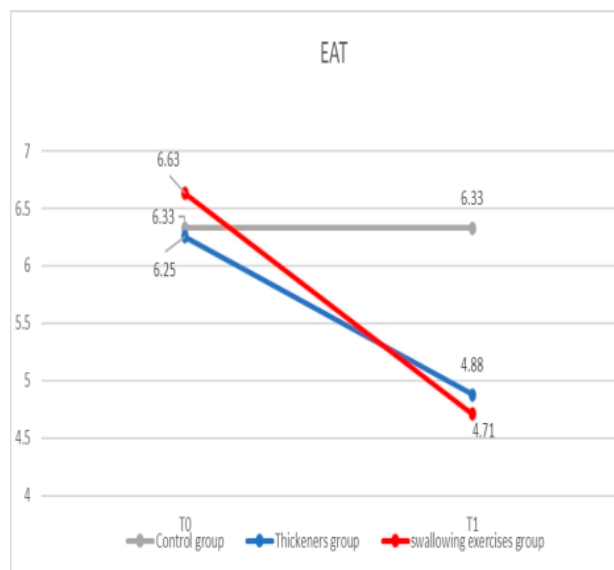

**Figure B**

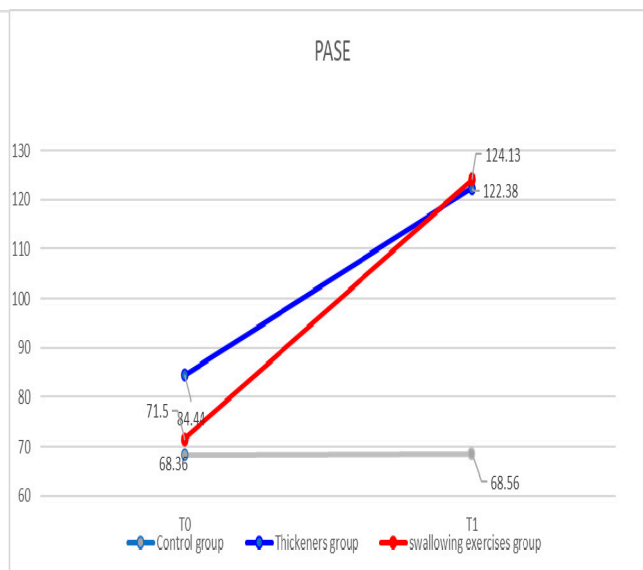

EAT, Eating Assessment Tool

T0, Before intervention; T1, After intervention

PASE, Physical Activity Scale for the Elderly

T0, Before intervention; T1, After intervention

**Figure C**

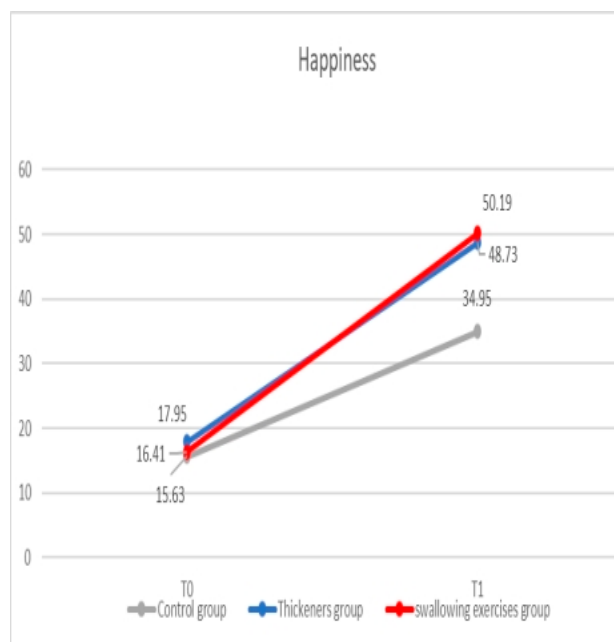

T0, Before intervention; T1, After intervention

**Figure D**

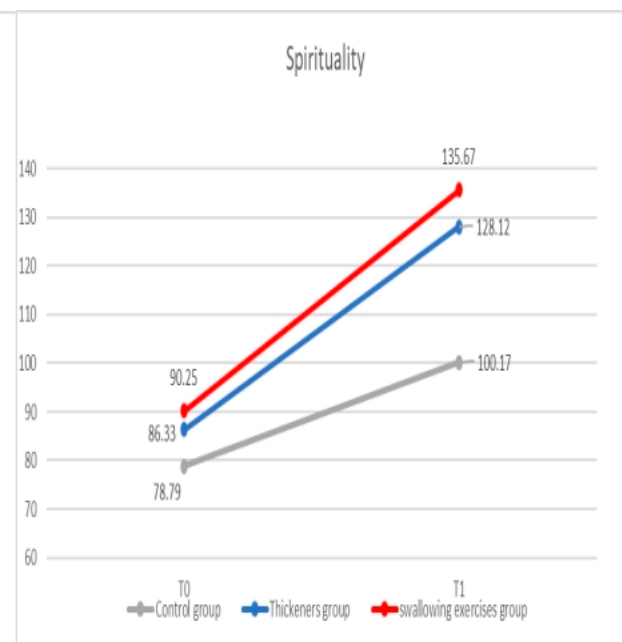

T0, Before intervention; T1, After intervention
